# Supplementary material for: Molecular Manipulation of the miR396 and miR399 Expression Modules Alters the Response of Arabidopsis thaliana to Phosphate Stress
Source: MDPI journal article supplement (doi:10.3390/plants10122570), 2021-11-24
Supplement: s1 [file s1]

# Molecular manipulation of the miR396 and miR399 Expression Modules Alters the Response of *Arabidopsis thaliana* to Phosphate Stress

Joseph L. Pegler<sup>1</sup>, Duc Quan Nguyen<sup>1,2</sup>, Jackson M.J. Oultram<sup>1</sup>, Christopher P.L. Grof<sup>1,†</sup> and Andrew L. Eamens<sup>1,3,4,†,\*</sup>

<sup>1</sup> Centre for Plant Science, School of Environmental and Life Sciences, Faculty of Science, University of Newcastle, Callaghan, NSW 2308, Australia; joseph.pegler@newcastle.edu.au (J.L.P.); ducquan.nguyen@uon.edu.au (D.Q.N.); jackson.oultram@uon.edu.au (J.M.J.O.); chris.grof@newcastle.edu.au (C.P.L.G).

<sup>2</sup> Institute of Genome Research, Vietnam Academy of Research and Technology, 18 Hoang Quoc Viet Str., Cau Giay, Hanoi 100000, Vietnam.

<sup>3</sup> School of Science, Technology and Engineering, University of the Sunshine Coast, Maroochydore, Queensland, Australia, 4558.

<sup>4</sup> School of Chemistry and Molecular Biosciences, The University of Queensland, Brisbane, Queensland, Australia, 4072.

\* Correspondence: a.eamens@uq.edu.au

**Table S1.** The DNA oligonucleotide sequences of the stem-loop primers used for the reverse transcription of miR396- and miR399-specific cDNAs are provided below in the Table S1 (denoted by RTSL). Post synthesis of a miR396- and miR399-specific cDNA, miRNA-specific forward primers (denoted by RTF in the below Table) together with a generic reverse primer (denoted by SLR in the below table (underlined sequence of the RTSL primer identifies the binding site for the generic reverse primer)) were used to quantify miR396 and miR399 abundance. Also provided below in Table S1 is the sequence of the DNA oligonucleotide used as either the forward (denoted by RTF in the below Table) or reverse (denoted by RTR in the below Table) primer to quantify the expression of either miR396 or miR399 target genes, or a cohort of PO<sub>4</sub>-related high molecular weight RNA transcripts. The snoRNA, *snoR101*, was used to normalize miRNA abundance across the different plant lines assessed in this study. The reference gene, *UBI10* (*AT4G05320*), was used to normalize the expression of each analyzed high molecular transcript.

| Targeted Sequence                                                      | Primer Name         | Oligonucleotide sequence (5' to 3')                |
|------------------------------------------------------------------------|---------------------|----------------------------------------------------|
| <b>DNA oligonucleotides used to quantify sRNA abundance</b>            |                     |                                                    |
| <b>miR396</b>                                                          | <b>p396-RTSL</b>    | GTCGTATCCAGTGCAGGGTCCGAGGTATTCGCACTGGATACGACAAGTTC |
|                                                                        | <b>p396-RTF</b>     | GCGCGTTCCACAGCTTTCTTGAAC                           |
| <b>miR399</b>                                                          | <b>p399-RTSL</b>    | GTCGTATCCAGTGCAGGGTCCGAGGTATTCGCACTGGATACGACCAGGGC |
|                                                                        | <b>p399-RTF</b>     | GCATGCCAAAGGAGATTTGCCCTG                           |
| <b>miRNA stem-loop oligo</b>                                           | <b>pSLR-Generic</b> | CCAGTGCAGGGTCCGAGGTA                               |
| <b>snoR101</b>                                                         | <b>psnoR-RTF</b>    | CTTCACAGGTAAGTTCGCTTG                              |
|                                                                        | <b>psnoR-RTR</b>    | AGCATCAGCAGACCAGTAGTT                              |
| <b>DNA oligonucleotides used to analyze gene transcript expression</b> |                     |                                                    |
| <b>GRF1</b><br>( <i>AT2G22840</i> )                                    | <b>pGRF1-RTF</b>    | CGTCGCATAAACAAGCCTCG                               |
|                                                                        | <b>pGRF1-RTR</b>    | ATTTTCAGCTCTTCGGGCCAA                              |
| <b>GRF2</b><br>( <i>AT4G37740</i> )                                    | <b>pGRF2-RTF</b>    | CTTGGCCTGAAGAGCTGACA                               |
|                                                                        | <b>pGRF2-RTR</b>    | GTGTGTGGAGGAAGGGGATG                               |
| <b>GRF3</b><br>( <i>AT2G36400</i> )                                    | <b>pGRF3-RTF</b>    | CCATACGAGTCCCACATCGG                               |
|                                                                        | <b>pGRF3-RTR</b>    | CTGAGCTCATGGGGCTTGAA                               |
| <b>GRF7</b><br>( <i>AT5G53660</i> )                                    | <b>pGRF7-RTF</b>    | CATCCCCCACCCTTAGATCG                               |
|                                                                        | <b>pGRF7-RTR</b>    | TGCTTCCATGCTTCCGACAT                               |

| DNA oligonucleotides used to analyze gene transcript expression (continued) |                    |                             |
|-----------------------------------------------------------------------------|--------------------|-----------------------------|
| <b>GRF8</b><br>(AT4G24150)                                                  | <b>pGRF8-RTF</b>   | GCTGCTGTGACTGTAGCAGA        |
|                                                                             | <b>pGRF8-RTR</b>   | CTCATGCCATTGAGCTTCGC        |
| <b>GRF9</b><br>(AT2G45480)                                                  | <b>pGRF9-RTF</b>   | CTCACATGAGAATGCCGGGT        |
|                                                                             | <b>pGRF9-RTR</b>   | ATCAGAAACTCGGGGCAGTG        |
| <b>MIR399A</b><br>(AT1G29265)                                               | <b>p399A-RTF</b>   | AGGGTAAGATCTCTATTGGCAGGAAAC |
|                                                                             | <b>p399A-RTR</b>   | GCAGAAGAATTACAGGGCAAATCTCC  |
| <b>PHO2</b><br>(AT2G33770)                                                  | <b>pPHO2-RTF</b>   | ACCGTTTCTCATCAAGGCGT        |
|                                                                             | <b>pPHO2-RTR</b>   | GTGCCCCGTCCACCATAAGAA       |
| <b>PHR1</b><br>(AT4G28610)                                                  | <b>pPHR1-RTF</b>   | AAACCAACCCGGCGATTCA         |
|                                                                             | <b>pPHR1-RTR</b>   | CAGCCCATTTCATGCCAATCACTT    |
| <b>PHT1;4</b><br>(AT2G38940)                                                | <b>pPHT1-4-RTF</b> | TGTGCCGGCCGAAATCT           |
|                                                                             | <b>pPHT1-4-RTR</b> | TTGCTCCTAATTTTCCTGATGCT     |
| <b>PHT1;8</b><br>(AT1G20860)                                                | <b>pPHT1-8-RTF</b> | CCCGAAGTAAACCGTATGAGAA      |
|                                                                             | <b>pPHT1-8-RTR</b> | AATACGTCACCAAGATTCCAGCAA    |
| <b>PHT1;9</b><br>(AT1G76430)                                                | <b>pPHT1-9-RTF</b> | TGGAGCTGCAGGGAAGTTTG        |
|                                                                             | <b>pPHT1-9-RTR</b> | ATCTGGAAAACCGTCCTCTTCAT     |
| <b>UBI10</b><br>(AT4G05320)                                                 | <b>pUBI10-RTF</b>  | GGCCTTGTATAATCCCTGATGAATAAG |
|                                                                             | <b>pUBI10-RTR</b>  | AAAGAGATAACAGGAACGGAAACATA  |
